# Supplementary material
Source: PubMed Central journal article supplement (PMC7129284)
Supplement: mmc1.pdf [file mmc1.pdf]

## Table S1

Crystal diffraction and structural refinement statistics of atragin (after pH jump)

| <b>Crystal data</b>                       | <b>Atragin (pH 7.4)</b>                               |
|-------------------------------------------|-------------------------------------------------------|
| Wavelength (Å)                            | 1.00                                                  |
| Temperature (K)                           | 110                                                   |
| Resolution Range (Å)<br>(outermost shell) | 30 - 3.23 (3.38-3.23)                                 |
| Space group                               | <i>P</i> 4 <sub>3</sub> 2 <sub>1</sub> 2              |
| Unique reflections                        | 14,579                                                |
| Completeness (%)                          | 93.9 (99.8)                                           |
| <i>I</i> / $\sigma$ <sub><i>I</i></sub>   | 18.1(6.0)                                             |
| Average redundancy                        | 6.8                                                   |
| <i>R</i> <sub>sym</sub> (%)               | 17.4 (36.0)                                           |
| Mosaicity (°)                             | 0.75                                                  |
| Unit-cell parameters<br>(Å)               | <i>a</i> = 91.12, <i>c</i> = 126.047                  |
| No. of protein<br>molecules per A.U.      | 1                                                     |
| <b>Refinement results</b>                 |                                                       |
| Final refinement                          | <i>R</i> = 20.65 %, <i>R</i> <sub>free</sub> = 22.92% |

$R_{\text{sym}} = \frac{\sum_h \sum_i [|I_i(h) - \langle I(h) \rangle|]}{\sum_h \sum_i I_i(h)}$ , where  $I_i$  is the *i*th measurement and  $\langle I(h) \rangle$  is the weighted mean of all measurements of  $I(h)$ .

Reflections of  $2\sigma_I$  cutoff were applied in generating the statistics.  $R = \frac{\sum_h |F_o - F_c|}{\sum_h F_o}$ , where  $F_o$  and  $F_c$  are the observed and calculated structure factor amplitudes of reflection.
